# Supplementary material
Source: PubMed Central journal article supplement (PMC3057827)
Supplement: supp_M110.191304_jbc.M110.191304-1.pdf [file supp_M110.191304_jbc.M110.191304-1.pdf]

## Supplementary information

to

### Discovery and structural characterization of fucosylated oligomannosidic N-glycans in mushrooms

Josephine Grass<sup>1</sup>, Martin Pabst<sup>1</sup>, Daniel Kolarich<sup>1</sup>, Gerald Pörtl<sup>1</sup>, Renaud Léonard<sup>1</sup>, Lothar Brecker<sup>2</sup>, and Friedrich Altmann<sup>1#</sup>

<sup>1</sup> University of Natural Resources and Life Sciences, Department of Chemistry, Vienna, Austria

<sup>2</sup> University of Vienna, Institute of Organic Chemistry, Vienna, Austria

# corresponding author: Friedrich Altmann ([friedrich.altmann@boku.ac.at](mailto:friedrich.altmann@boku.ac.at))

#### Supplementary Figures:

**Supplemental Fig. 1:** The plot depicts the correlation of the number of mannose and fucose residues. The spot size indicates the relative peak height in the MALDI spectrum

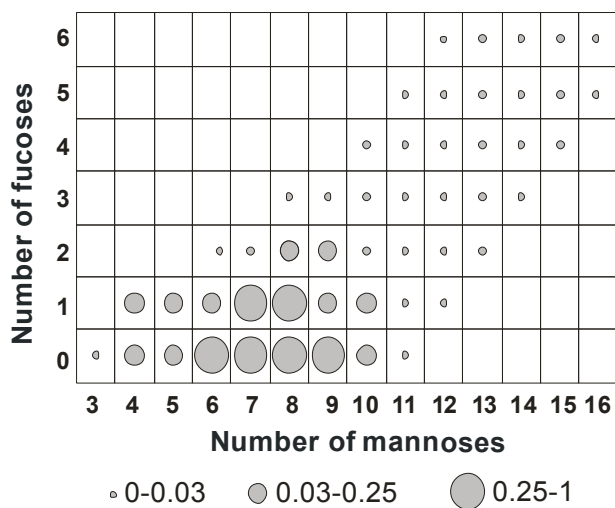

**Supplemental Fig. 2:** MALDI-TOF-MS spectra for mushrooms species containing fucosylated N-glycans. Hex (or H for brevity) stands for hexose or *bona fide* mannose, F for fucose residues. The dashed lines delineate the positions of glycans with one fucose residue.

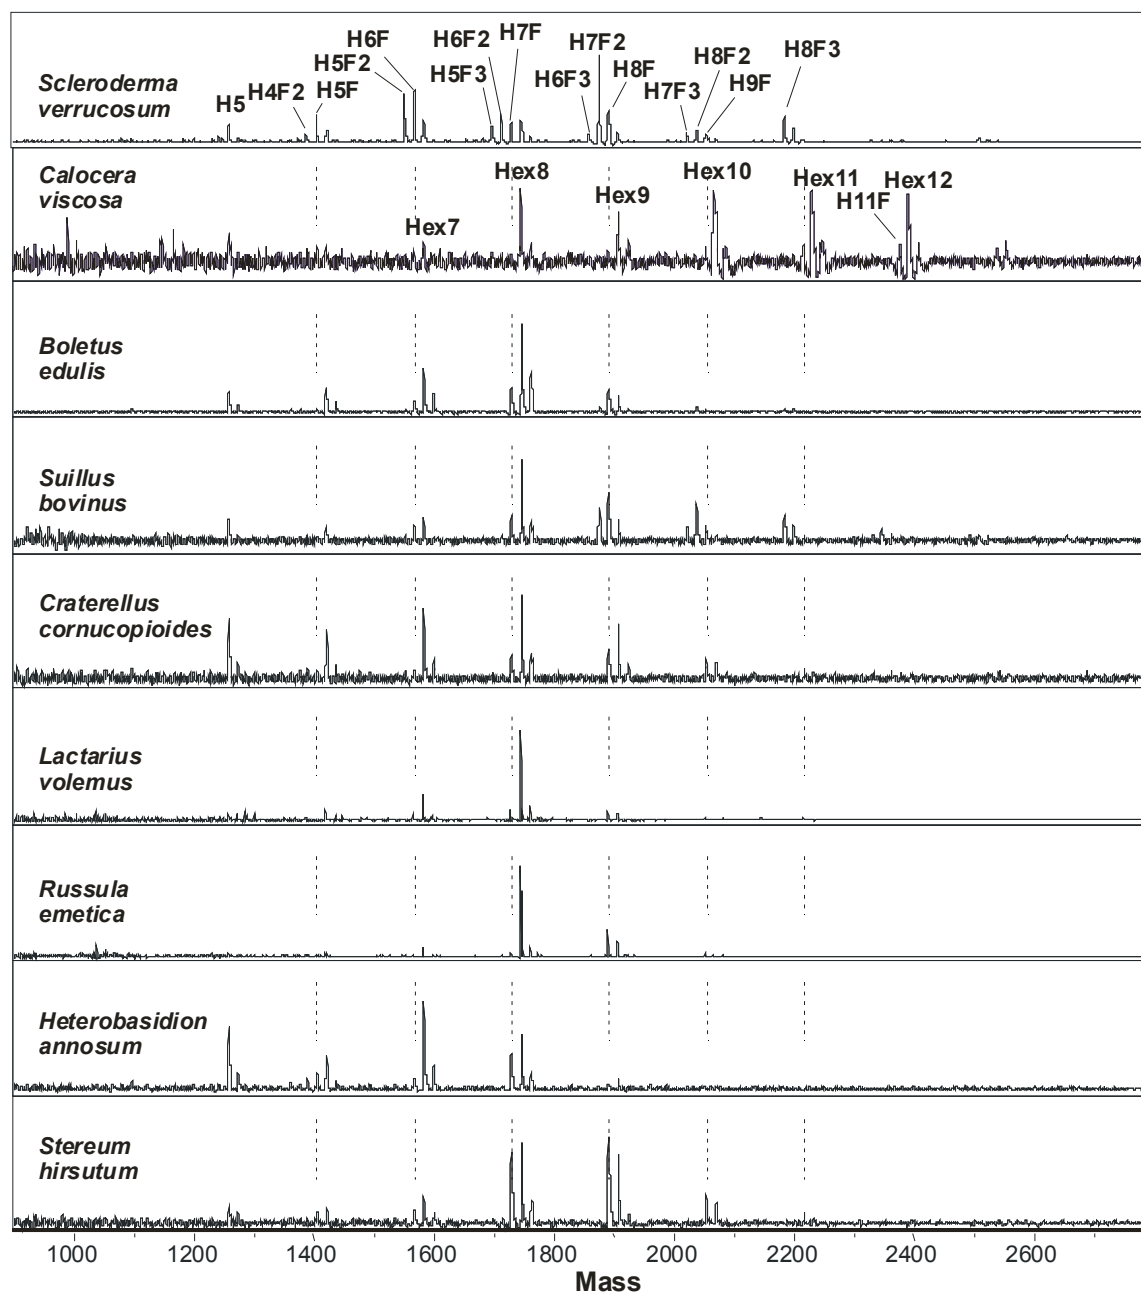

**Supplemental Fig. 3:** MALDI-TOF-MS spectra for mushrooms species containing non-fucosylated N-glycans only.

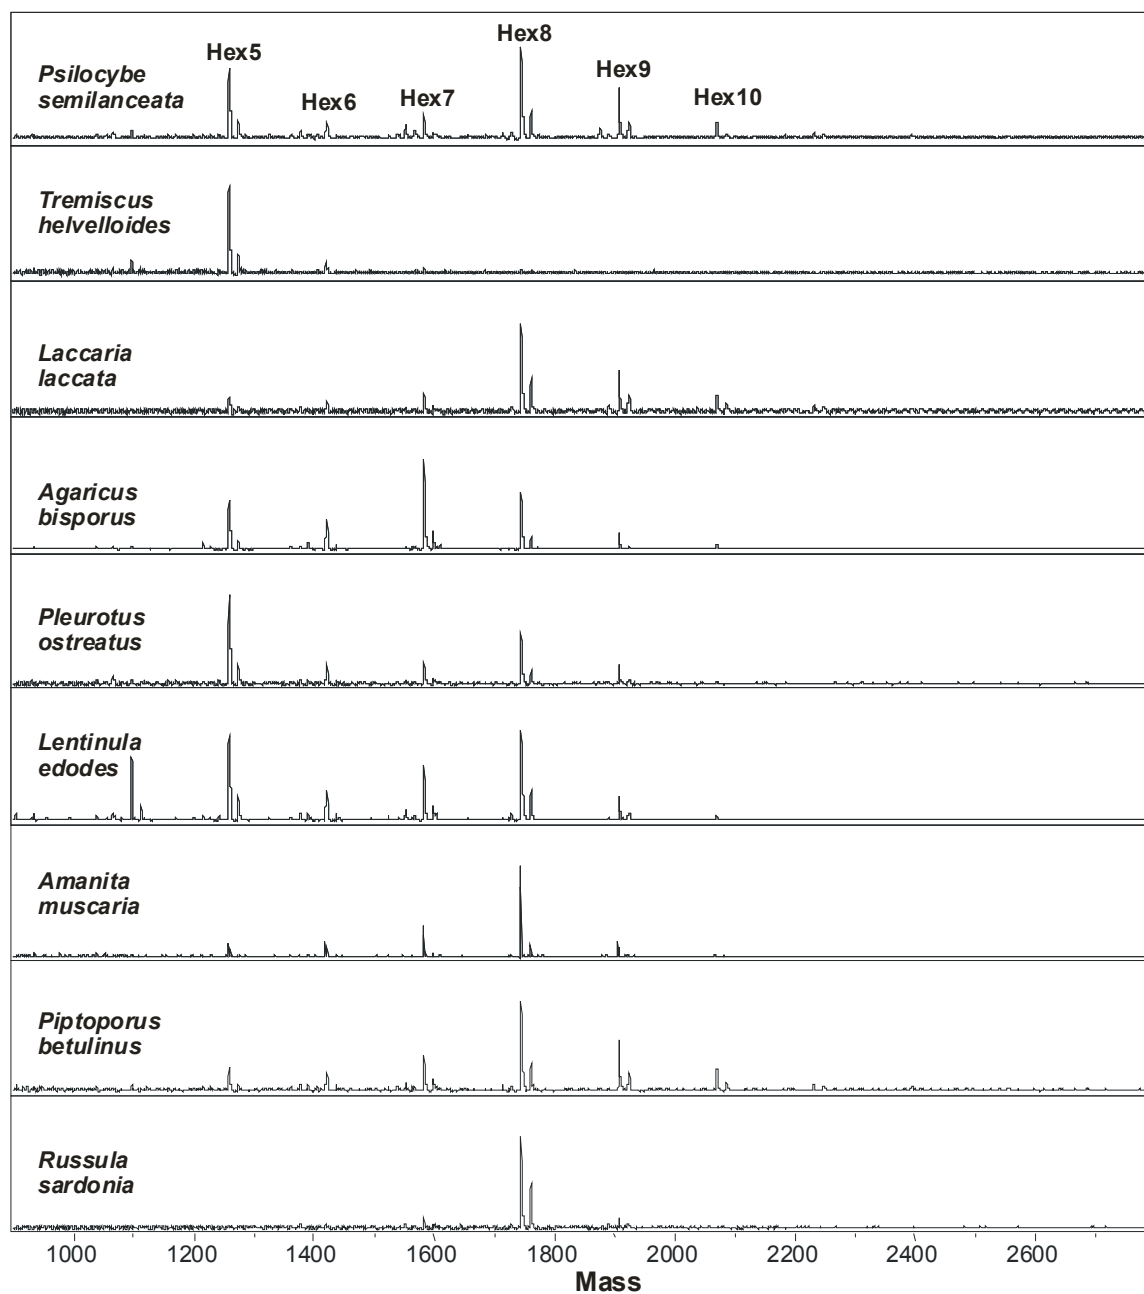

**Supplemental Fig. 4:** Preparation of individual glycan structures. PA-labelled glycans from 5 kg of chanterelles were first fractionated by normal-phase HPLC on an amide-silica column. Fractions were analyzed by mass spectrometry and those containing fucosylated N-glycans were further separated by RP-HPLC. Panel **A** shows a typical normal-phase chromatogram. Panel **B** depicts the preparation of the Man7Fuc isomers by RP-HPLC.

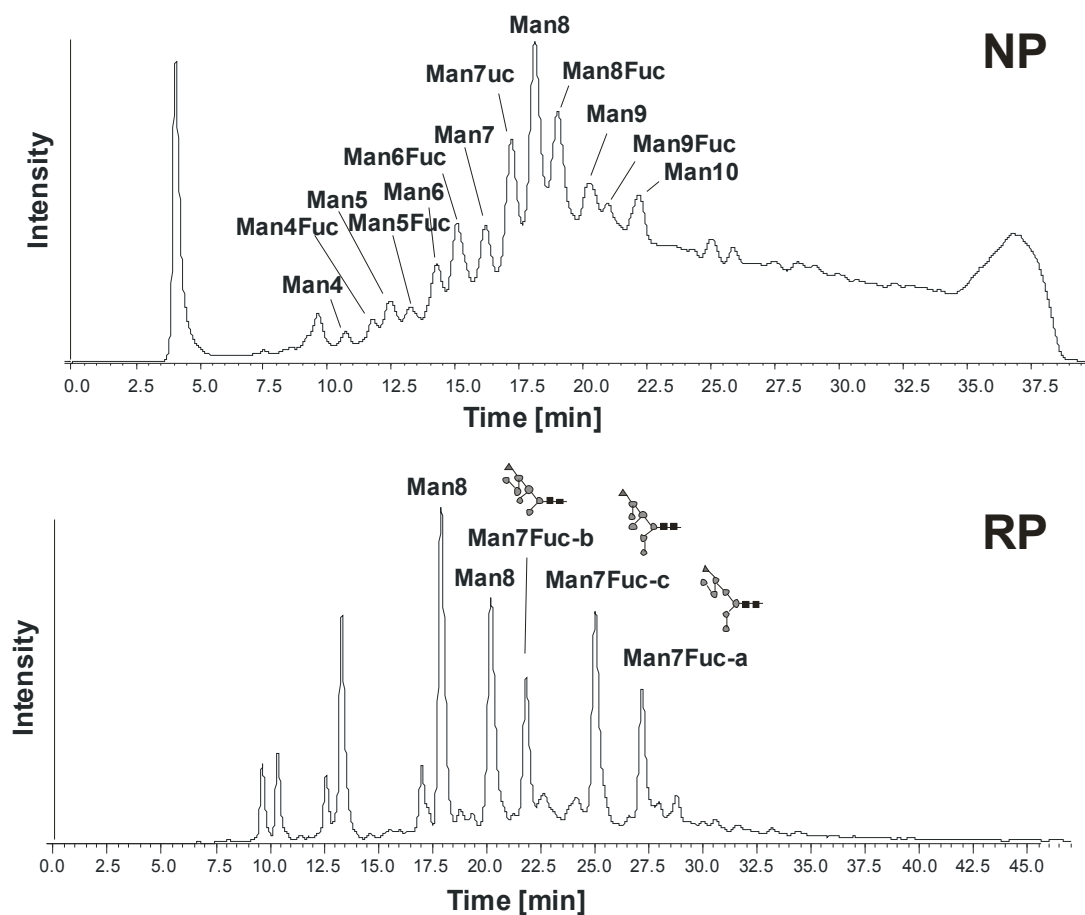

**Supplemental Fig. 5:** Glycosidase digestions of Man6Fuc. Panels **A** and **B** show the spectra of Man6Fuc before and after digestion with  $\alpha$ -mannosidase, which generated Man3Fuc as the smallest product. The thereby obtained Man3Fuc was treated with bovine kidney  $\alpha$ -fucosidase. Panels **C** and **D** depict the results of digestion of Man3Fuc with bovine kidney  $\alpha$ -fucosidase. Panels **E** (control) and **F** (digested sample) show the effect of a five-fold lower dose of fucosidase on the favourable substrate IgG glycopeptide Ser-(GnGnF<sup>6</sup>-)Asn

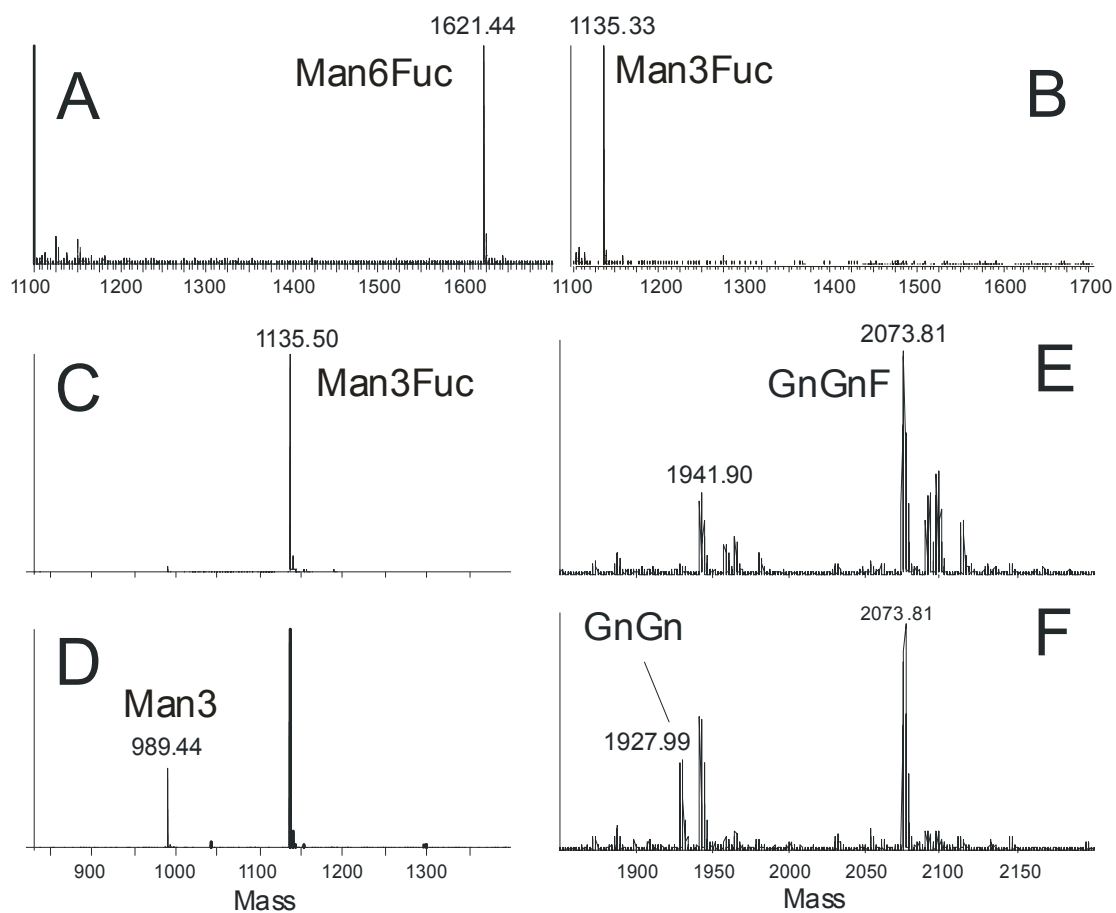

## Supplementary NMR data

### $^1\text{H}$ NMR chemical shifts (ppm) of isolated oligosaccharides

#### 1.) Man4Fuc

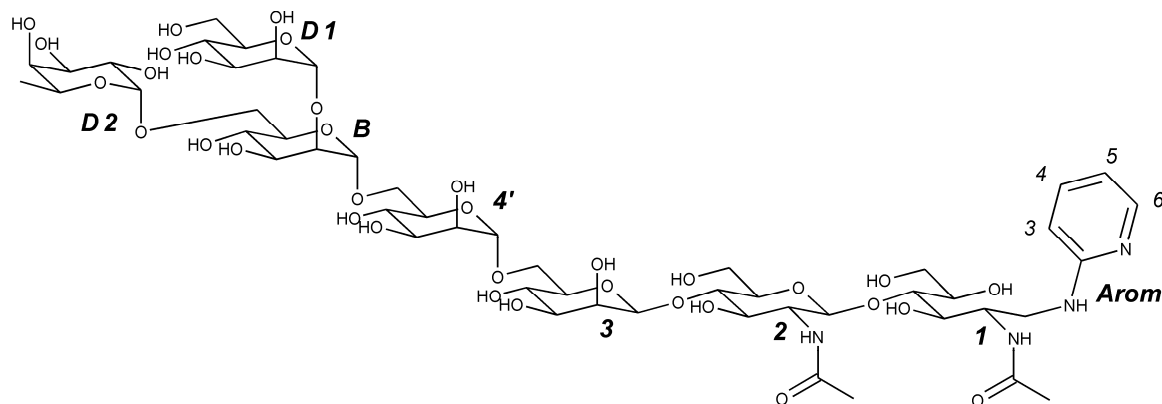

| unit  | pos. 1         | pos. 2 | pos. 3 | pos. 4 | pos. 5 | pos. 6a | pos. 6b | Ac   |
|-------|----------------|--------|--------|--------|--------|---------|---------|------|
| arom. | -              | -      | 6.61   | 7.52   | 6.64   | 7.81    | -       | -    |
| 1     | 3.74 &<br>3.64 | 4.35   | 3.91   | 3.85   | 3.91   | 3.82    | 3.75    | 1.95 |
| 2     | 4.64           | 3.75   | 3.80   | 3.74   | 3.52   | 3.83    | 3.76    | 2.07 |
| 3*    | nd             | nd     | nd     | nd     | nd     | nd      | nd      | -    |
| 4'    | 4.89           | 3.94   | 3.89   | nd     | nd     | 4.00    | 3.69    | -    |
| B     | 5.14           | 4.02   | 3.88   | nd     | nd     | 3.80    | 3.75    | -    |
| D1    | 5.04           | 4.06   | 3.80   | nd     | nd     | 3.87    | 3.73    | -    |
| D2    | 4.92           | 3.78   | 3.84   | 3.77   | 4.14   | 1.21    | -       | -    |

nd not determined

\* only determined for Man5Fuc and Man6Fuc at 308 K

## 2.) Man5Fuc

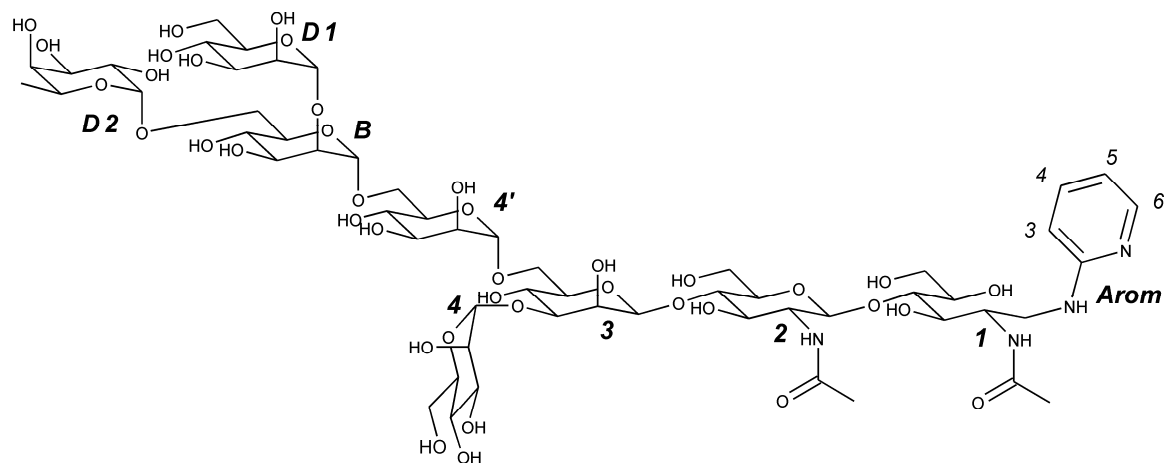

| unit  | pos. 1         | pos. 2 | pos. 3 | pos. 4 | pos. 5 | pos. 6a | pos. 6b | Ac   |
|-------|----------------|--------|--------|--------|--------|---------|---------|------|
| arom. | -              | -      | 6.67   | 7.57   | 6.74   | 7.98    | -       | -    |
| 1     | 3.74 &<br>3.64 | 4.35   | 3.91   | 3.85   | 3.91   | 3.82    | 3.75    | 1.94 |
| 2     | 4.64           | 3.76   | 3.80   | 3.74   | 3.52   | 3.83    | 3.76    | 2.06 |
| 3*    | 4.77           | 4.10   | 3.78   | 3.72   | 3.64   | 3.92    | 3.86    | -    |
| 4     | 5.10           | 4.06   | 3.79   | nd     | nd     | 3.81    | 3.70    | -    |
| 4'    | 4.92           | 3.95   | 3.85   | nd     | nd     | 3.98    | 3.64    | -    |
| B     | 5.15           | 4.05   | 3.88   | nd     | nd     | 3.85    | 3.75    | -    |
| D1    | 5.04           | 4.06   | 3.79   | nd     | nd     | 3.85    | 3.71    | -    |
| D2    | 4.92           | 3.80   | 3.84   | 3.78   | 4.15   | 1.21    | -       | -    |

nd not determined

\* at 308 K

## 3.) Man6Fuc

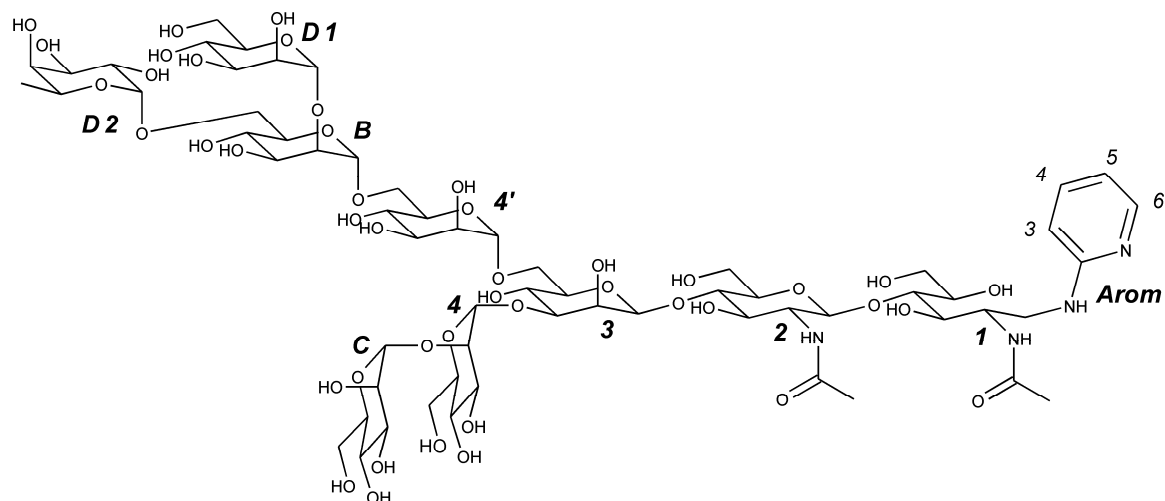

| unit  | pos. 1         | pos. 2 | pos. 3 | pos. 4 | pos. 5 | pos. 6a | pos. 6b | Ac   |
|-------|----------------|--------|--------|--------|--------|---------|---------|------|
| arom. | -              | -      | 6.67   | 7.56   | 6.73   | 7.98    | -       | -    |
| 1     | 3.74 &<br>3.64 | 4.35   | 3.91   | 3.85   | 3.91   | 3.82    | 3.75    | 1.94 |
| 2     | 4.64           | 3.77   | 3.81   | 3.74   | 3.52   | 3.83    | 3.76    | 2.05 |
| 3*    | 4.79           | 4.14   | 3.73   | 3.70   | 3.65   | 3.93    | 3.83    | -    |
| 4     | 5.35           | 4.10   | 4.01   | 3.67   | 3.74   | 3.85    | 3.75    | -    |
| 4'    | 4.92           | 3.98   | 3.88   | 3.68   | nd     | 3.95    | 3.66    | -    |
| B     | 5.13           | 4.03   | 3.90   | nd     | nd     | 3.95    | 3.66    | -    |
| C     | 5.06           | 4.02   | 3.80   | nd     | nd     | 3.82    | 3.68    | -    |
| D1    | 5.05           | 4.07   | 3.78   |        |        | 3.88    | 3.70    | -    |
| D2    | 4.92           | 3.79   | 3.84   | 3.78   | 4.15   | 1.22    | -       | -    |

nd not determined

\* at 308 K



## 4.) Man7Fuc-a

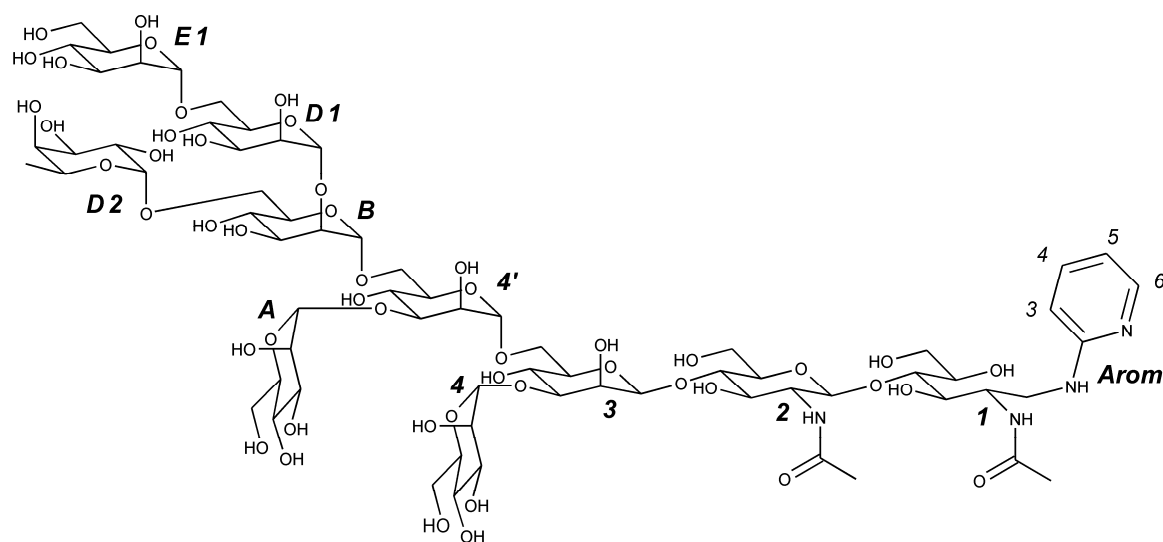

| unit  | pos. 1         | pos. 2 | pos. 3 | pos. 4 | pos. 5 | pos. 6a | pos. 6b | Ac   |
|-------|----------------|--------|--------|--------|--------|---------|---------|------|
| arom. | -              | -      | 6.73   | 7.64   | 6.76   | 7.95    | -       | -    |
| 1     | 3.74 &<br>3.64 | 4.34   | 3.91   | 3.85   | 3.91   | 3.82    | 3.75    | 1.93 |
| 2     | 4.63           | 3.76   | 3.80   | 3.72   | 3.51   | 3.83    | 3.76    | 2.06 |
| 3*    | nd             | nd     | nd     | nd     | nd     | nd      | nd      | -    |
| 4     | 5.10           | 4.04   | 3.80   | nd     | nd     | 3.80    | 3.70    | -    |
| 4'    | 4.88           | 4.00   | 3.82   | nd     | nd     | 4.02    | 3.70    | -    |
| A     | 5.09           | 3.93   | 3.84   | nd     | nd     | nd      | nd      | -    |
| B     | 5.14           | 3.95   | 3.90   | nd     | nd     | 3.90    | 3.70    | -    |
| D1    | 5.05           | 4.05   | 3.80   | nd     | nd     | 3.95    | 3.75    | -    |
| D2    | 4.92           | 3.79   | 3.84   | 3.77   | 4.13   | 1.24    | -       | -    |
| E1    | 4.90           | 3.95   | 3.93   | 3.62   | 3.70   | 3.85    | 3.70    | -    |

nd not determined

\* only determined for Man5Fuc and Man6Fuc at 308 K

## 5.) Man7Fuc-b

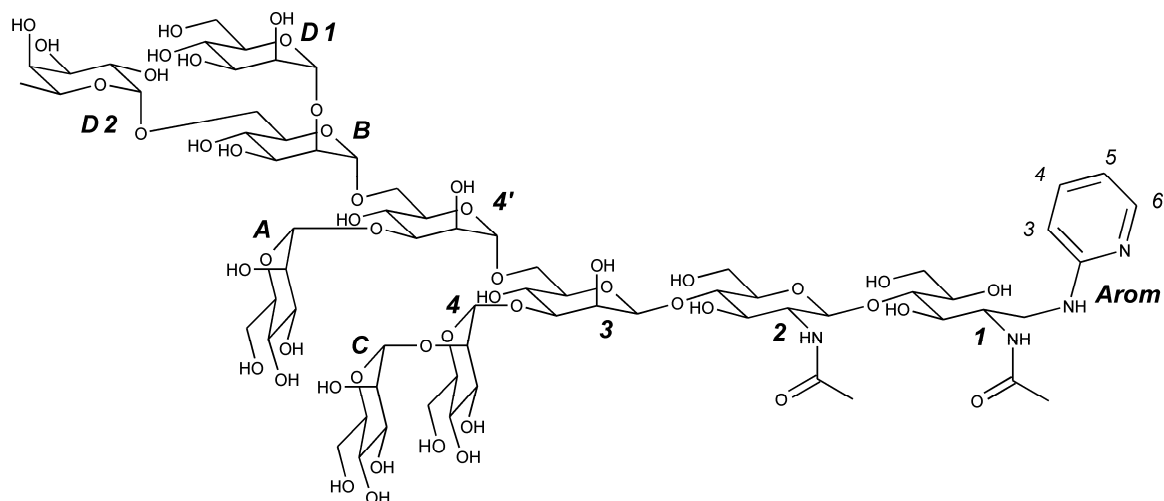

| unit  | pos. 1         | pos. 2 | pos. 3 | pos. 4 | pos. 5 | pos. 6a | pos. 6b | Ac   |
|-------|----------------|--------|--------|--------|--------|---------|---------|------|
| arom. | -              | -      | 6.73   | 7.66   | 6.77   | 7.95    | -       | -    |
| 1     | 3.74 &<br>3.64 | 4.34   | 3.91   | 3.85   | 3.91   | 3.82    | 3.75    | 1.94 |
| 2     | 4.63           | 3.74   | 3.80   | 3.73   | 3.51   | 3.83    | 3.76    | 2.05 |
| 3*    | nd             | nd     | nd     | nd     | nd     | nd      | nd      | -    |
| 4     | 5.35           | 4.09   | 4.02   | 3.67   | 3.69   | 3.85    | 3.72    | -    |
| 4'    | 4.86           | 3.95   | 3.83   | nd     | nd     | 4.00    | 3.60    | -    |
| A     | 5.08           | 3.91   | 3.87   | nd     | nd     | nd      | nd      | -    |
| B     | 5.14           | 3.95   | 3.90   | nd     | nd     | 3.90    | 3.70    | -    |
| C     | 5.06           | 3.98   | 3.82   | nd     | nd     | 3.82    | 3.69    | -    |
| D1    | 5.04           | 4.07   | 3.79   | nd     | nd     | 3.89    | 3.70    | -    |
| D2    | 4.92           | 3.81   | 3.86   | 3.90   | 4.14   | 1.24    | -       | -    |

nd not determined

\* only determined for Man5Fuc and Man6Fuc at 308 K

## 6.) Man7Fuc-c

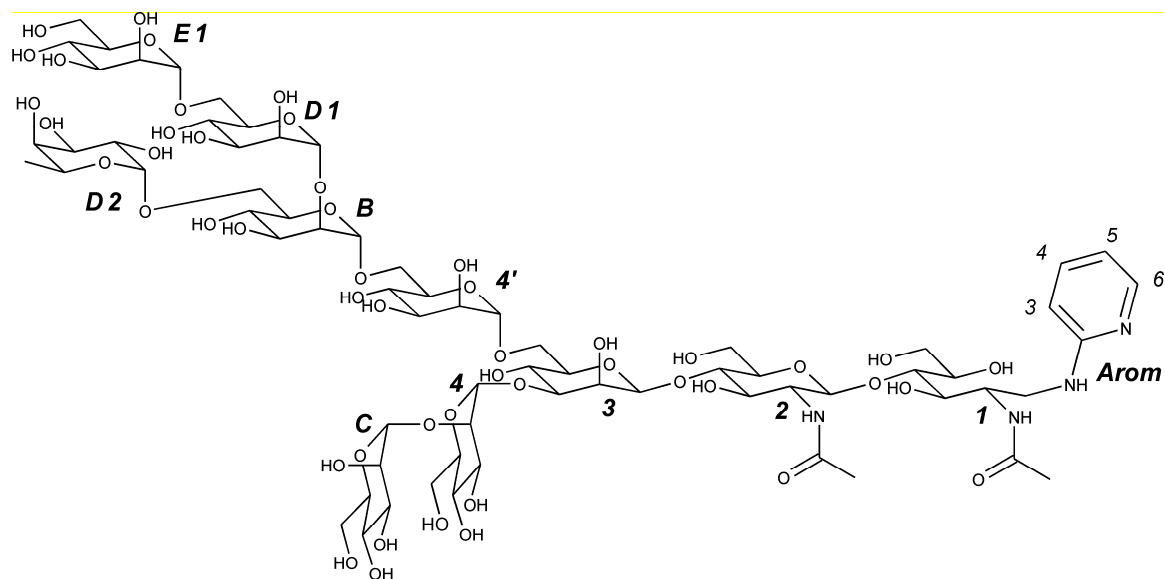

| unit  | pos. 1         | pos. 2 | pos. 3 | pos. 4 | pos. 5 | pos. 6a | pos. 6b | Ac   |
|-------|----------------|--------|--------|--------|--------|---------|---------|------|
| arom. | -              | -      | 6.73   | 7.64   | 6.76   | 7.95    | -       | -    |
| 1     | 3.74 &<br>3.64 | 4.35   | 3.91   | 3.85   | 3.91   | 3.82    | 3.75    | 1.94 |
| 2     | 4.64           | 3.75   | 3.80   | 3.74   | 3.52   | 3.83    | 3.76    | 2.07 |
| 3*    | nd             | nd     | nd     | nd     | nd     | nd      | nd      | -    |
| 4     | 5.36           | 4.11   | 4.00   | 3.68   | 3.72   | 3.88    | 3.73    | -    |
| 4'    | 4.89           | 3.96   | 3.90   | nd     | nd     | 3.98    | 3.66    | -    |
| B     | 5.13           | 3.98   | 3.88   | nd     | nd     | 3.95    | 3.69    | -    |
| C     | 5.06           | 3.99   | 3.82   | nd     | nd     | 3.82    | 3.68    | -    |
| D1    | 5.05           | 4.08   | 3.78   | nd     | nd     | 3.93    | 3.74    | -    |
| D2    | 4.92           | 3.78   | 3.84   | 3.78   | 4.12   | 1.24    | -       | -    |
| E1    | 4.91           | 3.95   | 3.93   | 3.60   | 3.70   | 3.85    | 3.70    | -    |

nd not determined

\* only determined for Man5Fuc and Man6Fuc at 308 K
